# Supplementary material
Source: PubMed Central journal article supplement (PMC10192070)

# cg10493270 and *ARHGEF12*

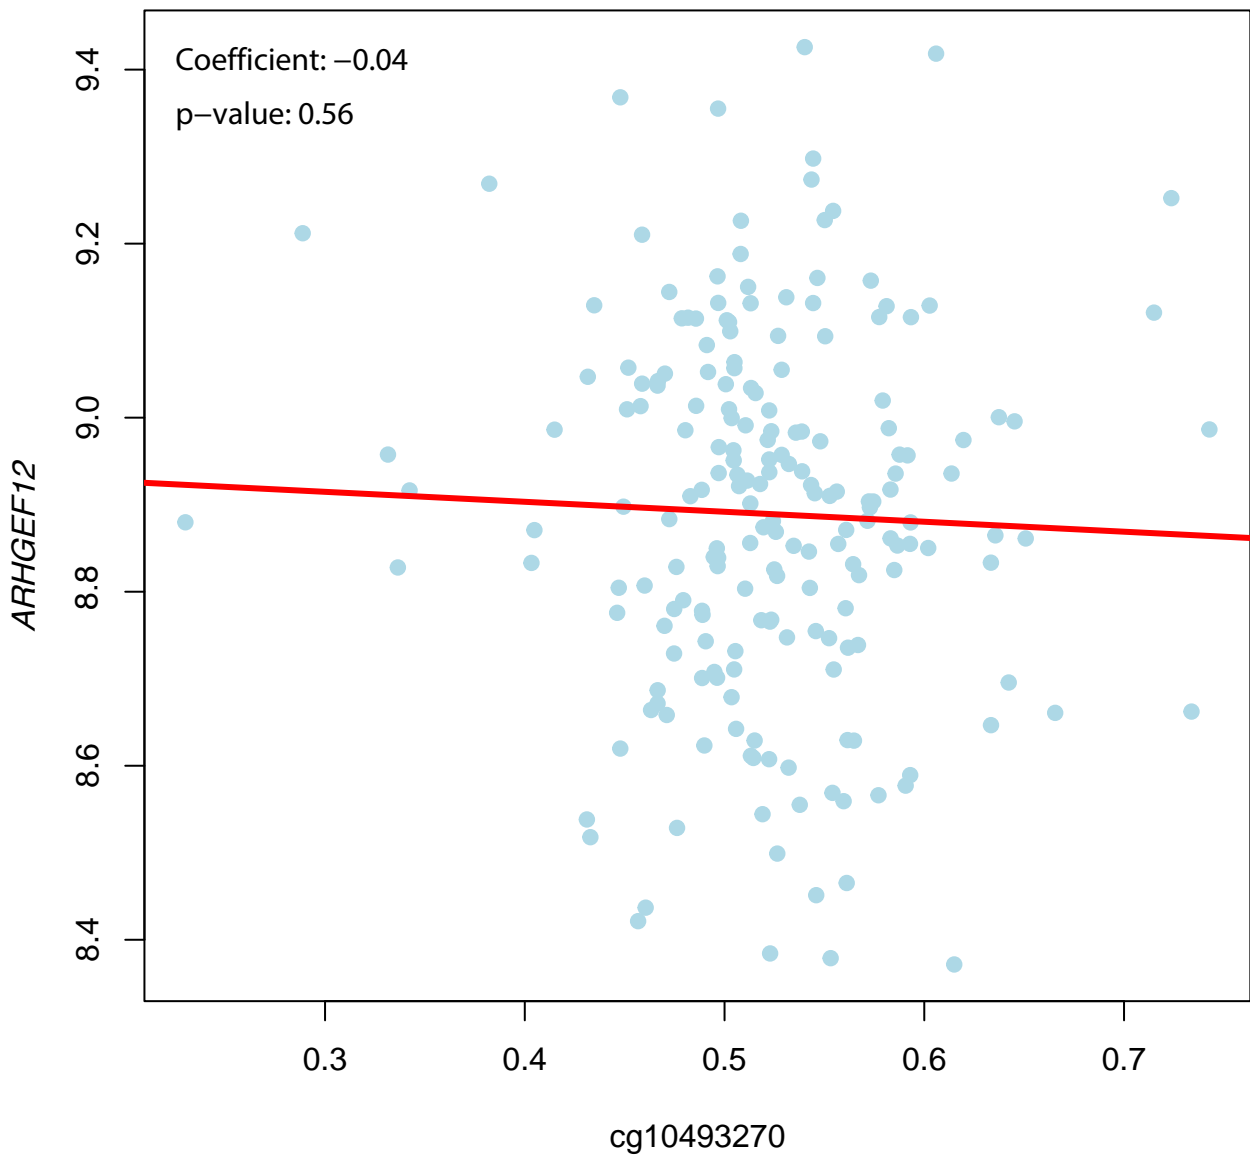

Supplement: NIHMS1879453-supplement-fS1.pdf [file NIHMS1879453-supplement-fS1.pdf]

# miR-27b-3p and ANKRD36

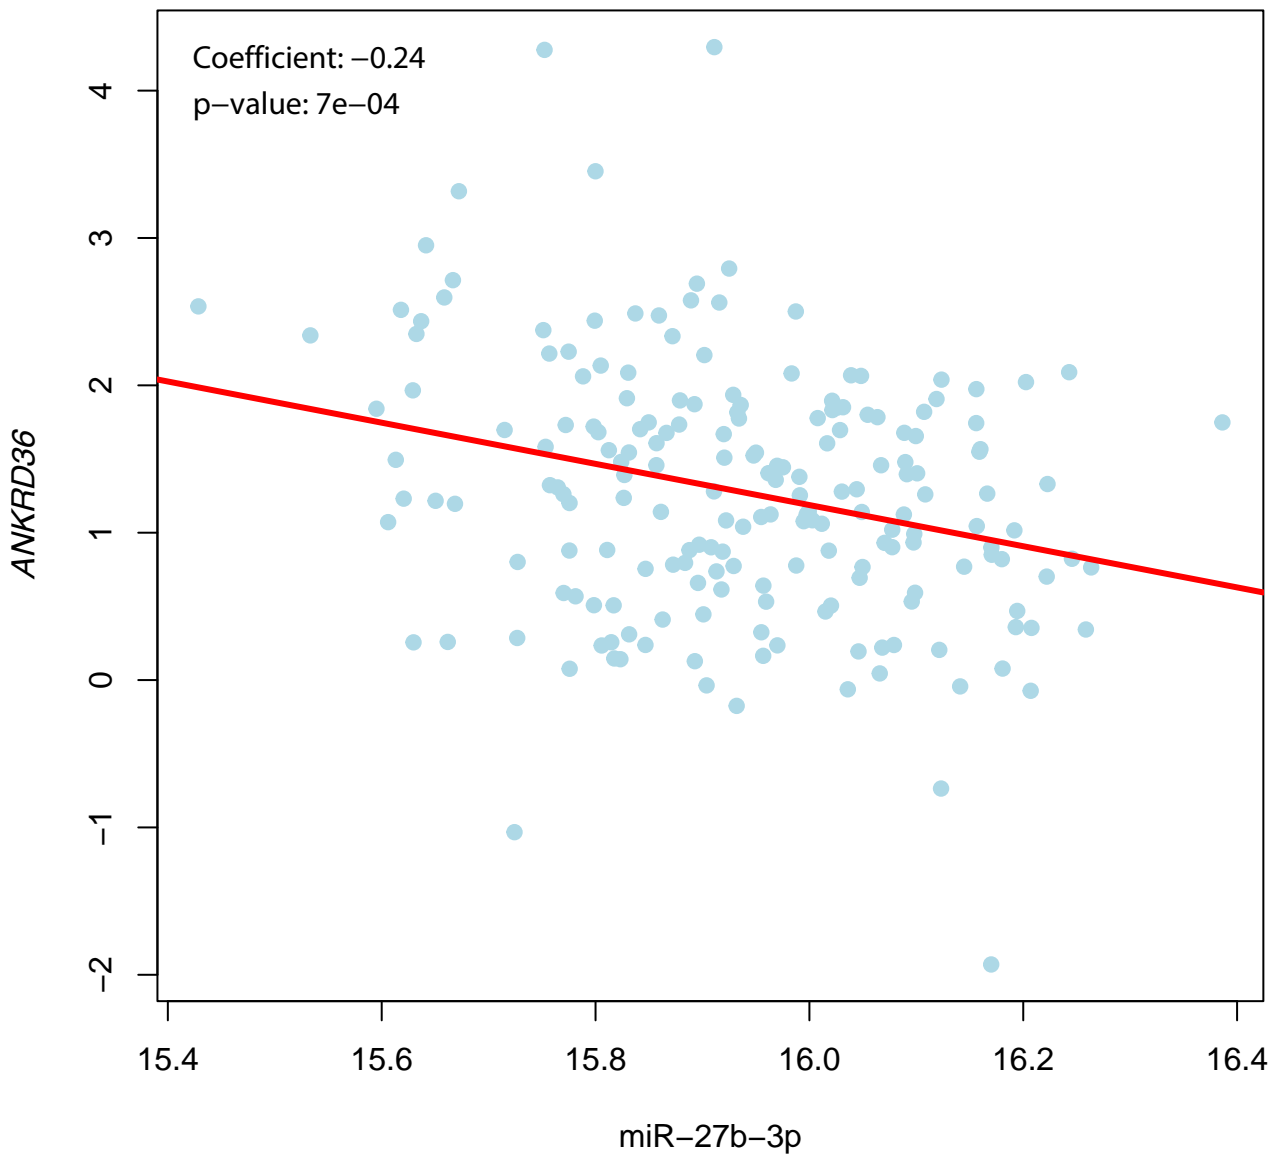

Supplement: NIHMS1879453-supplement-fS2.pdf [file NIHMS1879453-supplement-fS2.pdf]
